# Supplementary material
Source: publisher site journal article supplement (http://www.kjim.org/upload/media/kjim-2016-214-suppl2.pdf)
Supplement: Supplementary file 1 [file kjim-2016-214-suppl2.pdf]

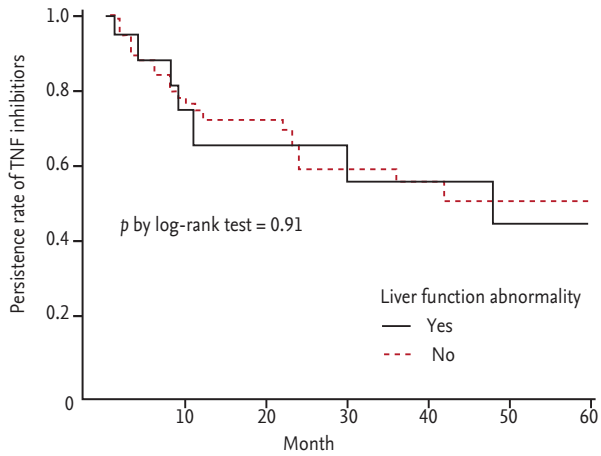

**Supplementary Figure 1.** The persistence of tumor necrotizing factor (TNF) inhibitor was compared by Kaplan-Meier method. The statistical significance was evaluated with log-rank test between patients who did and did not experience liver function abnormality.
